# Supplementary material
Source: publisher site journal article supplement (https://www.dovepress.com/get_supplementary_file.php?f=487043.xlsx)
Supplement: Supplementary file 1 [file get_supplementary_file.php]

## Sheet: Sheet1
Appendix 1. AUC-ROC of frailty, cognitive impairment and predictive model
	AUC	Sensitivity (%)	Specificity (%)	P value
Frailty	0.657	38.98	79.58	0.9a
Cognitive impairment	0.661	54.24	72.5	0.9b
Predictive model	0.814	79.66	79.58	＜0.0001a,＜0.0001b
Pa: compared with cognitive impairment, Pb: compared with frailty
Abbreviations: AUC-ROC:the area under the receiver operating characteristic curve
Appendix 2. Literature review
Title	Authors	Journal	Publication date	volume	Page number	Article type
Electroencephalography and delirium in the postoperative period	Palanca B, Wildes TS, Ju YS, et al	Br J Anaesth	2017	119	294-307	Review
Intraoperative infusion of dexmedetomidine for prevention of postoperative delirium and cognitive dysfunction in elderly patients undergoing major elective noncardiac surgery: A randomized clinical trial.	Deiner S, Luo X, Lin HM, et al	JAMA. Surg.	2017	152	e171505.	Clinical Trail
Postoperative delirium is associated with decreased recovery of ambulation one-month after surgery	Robinson TN, Kovar A, Carmichael H, et al	Am J Surg.	2021	221	856-861	Clinical Trail
Effect of Regional vs General Anesthesia on Incidence of Postoperative Delirium in Older Patients Undergoing Hip Fracture Surgery: The RAGA Randomized Trial	Li T, Li J, Yuan L, et al	JAMA	2022	327	50-58	Clinical Trail
Delirium in elderly people	Inouye SK, Westendorp RG, Saczynski JS	Lancet	2014	383	911-922	Review
Preoperative cognitive performance and postoperative delirium are independently associated with future dementia in older people who have undergone cardiac surgery: A longitudinal cohort study	Lingehall HC, Smulter NS, Lindahl E, et al	Crit Care Med	2017	45	1295-1303	Clinical Trail
Prevention of postoperative delirium in elderly patients planned for elective surgery: Systematic review and meta-analysis.	Janssen TL, Alberts AR, Hooft L, et al	Clin Interv Aging	2019	14	1095-1117	Meta-Analysis
Evidence-based strategies to reduce the incidence of postoperative delirium: a narrative review	Swarbrick C.J, J. Partridge	Anaesthesia	2022	77	Suppl 1: 92-101	Review
A multidimensional approach to frailty in older people	Pilotto A, Custodero C, Maggi S, et al	Ageing Res Rev	2020	60	101047	Review
Prevalence of frailty in community-dwelling older persons: A systematic review	Collard RM, Boter H, Schoevers RA, et al	J Am Geriatr Soc	2012	60	1487-1492	Review
Classifying frailty in the ventral hernia population	Huggins A, Casson C, Holden T, et al.	Surg Endosc	2024	Online ahead of print	Online ahead of print	Clinical Trail
Frailty and perioperative outcomes: A narrative review. Can J Anaesth. 2015;62:143-157.	Beggs T, Sepehri A, Szwajcer A, et al	Can J Anaesth	2015	62	143-157	Review
Frailty syndrome and pre-operative risk evaluation: A systematic review.	Buigues C, Juarros-Folgado P, Fernandez-Garrido J, et al	Arch Gerontol Geriatr	2015	61	309-321	Review
Modified Frailty Index Predicts Morbidity and Mortality After Pancreaticoduodenectomy	Mogal H, Vermilion SA, Dodson R, et al	Ann Surg Oncol	2017	24	1714-1721	Clinical Trail
High preoperative modified frailty index has a negative impact on short- and long-term outcomes of octogenarians with gastric cancer after laparoscopic gastrectomy	Lu J, Zheng H L, Li P, et al	Surg Endosc	2018	32	2193-2200	Clinical Trail
Assessment of the impact of frailty on adverse surgical outcomes in patients undergoing surgery for intracranial tumors using modified frailty index: A systematic review and meta-analysis	Aghajanian S, Shafiee A, Ahmadi A, et al	J Clin Neurosci	2023	114	120-128	Meta-Analysis
The modified frailty index and patient outcomes following transforaminal lumbar interbody fusion surgery for single-level degenerative spine disease	Moses ZB, Oh SY, Fontes R, et al	J Neurosurg Spine	2021	35	163-169	Clinical Trail
Risk Stratification of Elderly Patients Undergoing Spinal Surgery Using the Modified Frailty Index.	Kweh B, Lee HQ, Tan T, et al	Global Spine J	2013	13	457-465	Clinical Trail
New 5-Factor Modified Frailty Index Using American College of Surgeons NSQIP Data.	Subramaniam S, Aalberg JJ, Soriano RP, et al	J Am Coll Surg	2018	226	173-181	Clinical Trail
Preexisting cognitive impairment is associated with postoperative cognitive dysfunction after hip joint replacement surgery	Silbert B, Evered L, Scott DA, et al	Anesthesiology	2015	122	1224-1234	Clinical Trail
Comparison between remifentanil and other opioids in adult critically ill patients: A systematic review and meta-analysis	Yang S, Zhao H, Wang H, et al	Medicine (Baltimore)	2021	100	e27275	Meta-Analysis
A synthesis of oral morphine equivalents (OME) for opioid utilisation studies.	Nielsen S, Degenhardt L, Hoban B, et al	Pharmacoepidemiol Drug Saf	2016	25	733-737	Review
Delirium in Older Patients after Combined Epidural-General Anesthesia or General Anesthesia for Major Surgery: A Randomized Trial	Li YW, Li HJ, Li HJ, et al	Anesthesiology	2021	135	218-232	Clinical Trail
Association of frailty with short-term outcomes, organ support and resource use in critically ill patients	Zampieri FG, Iwashyna TJ, Viglianti EM, et al	Intensive Care Med	2018	44	1512-1520	Clinical Trail
Accuracy of tau positron emission tomography as a prognostic marker in preclinical and prodromal alzheimer disease: A Head-to-Head comparison against amyloid positron emission tomography and magnetic resonance imaging	Ossenkoppele R, Smith R, Mattsson-Carlgren N, et al	JAMA Neurol	2021	78	961-971	Clinical Trail
Prevalence and clinical phenotype of quadruple misfolded proteins in older adults	Karanth S, Nelson PT, Katsumata Y, et al	AMA Neurol	2020	77	1299-1307	Clinical Trail
Delirium in elderly adults: Diagnosis, prevention and treatment	Fong TG, Tulebaev SR, Inouye SK	Nat Rev Neurol	2009	5	210-220	Review
Observational study examining the association of baseline frailty and postcardiac surgery delirium and cognitive change	Nomura Y, Nakano M, Bush B, et al	Anesth Analg	2019	129	507-514	Clinical Trail
Preoperative cognitive abnormality, intraoperative electroencephalogram suppression, and postoperative delirium: A mediation analysis	Fritz BA, King CR, Ben AA, et al	Anesthesiology	2020	132	1458-1468	Clinical Trail
The prevalence and impact of undiagnosed mild cognitive impairment in elderly patients undergoing thoracic surgery: A prospective cohort study	Tong C, Huang C, Wu J, et al	J Cardiothorac Vasc Anesth	2020	34	2413-2418	Clinical Trail
Impact of frailty on acute outcomes of endovascular thoracic and abdominal aneurysm repair	Kim ST, Tran Z, Hadaya J, et al	Surgery	2021	170	304-310	Clinical Trail
Usefulness of eight screening tools for predicting frailty and postoperative short- and long-term outcomes among older patients with cancer who qualify for abdominal surgery.	Kenig J, Szabat K, Mitus J, et al	Eur J Surg Oncol	2020	46	2091-2098	Clinical Trail
Sterile Inflammatory Response and Surgery-Related Trauma in Elderly Patients with Subtrochanteric Fractures.	Moldovan F	Biomedicines	2024	12	354	Clinical Trail
2014 ESC/ESA Guidelines on non-cardiac surgery: cardiovascular assessment and management: The Joint Task Force on non-cardiac surgery: cardiovascular assessment and management of the European Society of Cardiology (ESC) and the European Society of Anaesthesiology (ESA). Eur Heart J. 2014;35: 2383-431.	Kristensen SD, Knuuti J, Saraste A, et al	Eur Heart J	2014	35	2383-431	Practice Guideline
Delirium in Older Patients after Combined Epidural-General Anesthesia or General Anesthesia for Major Surgery: A Randomized Trial	Li YW, Li HJ, Li HJ, et al	Anesthesiology	2021	135	218-232	Clinical Trail
Processed electroencephalography-guided general anaesthesia to reduce postoperative delirium: a systematic review and meta-analysis	Sumner M, Deng C, Evered L, et al	Br J Anaesth	2023	130	e243-e253	Meta-Analysis
European Society of Anaesthesiology evidence-based and consensus-based guideline on postoperative delirium. Eur J Anaesthesiol. 2017;34:192-214.	Aldecoa C, Bettelli G, Bilotta F, et al	Eur J Anaesthesiol	2017	34	192-214	Review
Association of patient frailty with increased morbidity after common ambulatory general surgery operations	Seib C D, Rochefort H, Chomsky-Higgins K, et al	JAMA Surg	2018	153	160-168	Clinical Trail
Association of the modified frailty index with 30-day surgical readmission	Wahl TS, Graham LA, Hawn MT, et al	JAMA Surg	2017	152	749–757	Clinical Trail
Comparative Analysis of Frailty Scores for Predicting Adverse Outcomes in Hip Fracture Patients: Insights from the United States National Inpatient Sample	Forssten MP, Cao Y, Mohammad IA, et al	J Pers Med	2014	14	621	Clinical Trail
Deficit Accumulation and Phenotype Assessments of Frailty Both Poorly Predict Duration of Hospitalization and Serious Complications after Noncardiac Surgery	Sonny A, Kurz A, Skolaris LA, et al	Anesthesiology	2020	132	82-94	Clinical Trail
Frailty Predicts Failure to Rescue after Thoracoabdominal Operation	Mosquera C, Bermudez JM, Evans JL, et al	J Am Coll Surg	2018	226	978-986	Clinical Trail
Brief preoperative screening for frailty and cognitive impairment predicts delirium after spine surgery	Susano MJ, Grasfield RH, Friese M, et al	Anesthesiology	2020	133	1184-1191	Clinical Trail
A simple tool to predict development of delirium after elective surgery	Dworkin A, Lee DS, An AR, et al	J Am Geriatr Soc.	2016	64	e149-e153	Clinical Trail
The effect of a multidisciplinary care bundle on the incidence of delirium after hip fracture surgery: A quality improvement study.	Chuan A, Zhao L, Tillekeratne N, et al	Anaesthesia	2020	75	63-71	Clinical Trail
Preoperative cognitive impairment as a predictor of postoperative outcomes in a collaborative care model. J Am Geriatr Soc. 2018;66:584-589.	Zietlow K, Mcdonald SR, Sloane R, et al	J Am Geriatr Soc	2018	66	584-589	Clinical Trail
Preoperative Frailty Assessment Predicts Postoperative Mortality, Delirium and Pneumonia in Elderly Lung Cancer Patients: A Retrospective Cohort Study	Tian J Y, Hao X Y, Cao F Y, et al	Ann Surg Oncol	2023	30	7442-7451	Clinical Trail
Frailty and postoperative complications in older Chinese adults undergoing major thoracic and abdominal surgery	Han B, Li Q, Chen X	Clin Interv Aging	2019	14	947-957	Clinical Trail
Cognitive impairment and postoperative outcomes in patients undergoing primary total hip arthroplasty: A systematic review	Viramontes O, Luan EB, Erfe JM, et al	J Clin Anesth	2019	56	65-76	Review
